# 1 Impaired top-down auditory processing despite extensive single- 2 neuron responses during human sleep

3

4 Hanna Hayat<sup>1</sup>, Amit Marmelshtein<sup>2</sup>, Aaron J. Krom<sup>1,3</sup>, Yaniv Sela<sup>2</sup>, Ariel Tankus<sup>2,4,5</sup>,  
5 Ido Strauss<sup>4</sup>, Firas Fahoum<sup>5,6</sup>, Itzhak Fried<sup>4,7</sup>, Yuval Nir<sup>1,2</sup>

6

7 <sup>1</sup>*Department of Physiology & Pharmacology, Sackler School of Medicine, Tel Aviv*  
8 *University, Israel,*

9 <sup>2</sup>*Sagol School of Neuroscience, Tel Aviv University, Israel,*

10 <sup>3</sup>*Department of Anesthesiology and Critical Care Medicine, Hadassah-Hebrew*  
11 *University Medical Center; Faculty of Medicine, Hebrew University of Jerusalem,*  
12 *Israel,*

13 <sup>4</sup>*Functional Neurosurgery Unit, Tel Aviv Sourasky Medical Center, Tel Aviv, Israel,*

14 <sup>5</sup>*Department of Neurology & Neurosurgery, Sackler School of Medicine, Tel Aviv*  
15 *University, Israel,*

16 <sup>6</sup>*EEG and Epilepsy Unit, Department of Neurology, Tel Aviv Sourasky Medical Center,*  
17 *Tel Aviv, Israel*

18 <sup>7</sup>*Department of Neurosurgery, University of California Los Angeles, Los Angeles, USA*

19

20

21 **Sleep in all species is universally defined as a reversible, homeostatically-regulated**  
22 **state of a reduced behavioral responsiveness, with a high arousal threshold in**  
23 **response to external sensory stimulation<sup>1</sup>. However, it remains unclear whether**  
24 **sleep mainly gates motor output or affects responses along sensory pathways, and**  
25 **whether sleep primarily modulates specific aspects of the sensory response such as**  
26 **feedforward vs. feedback signaling<sup>2-7</sup>. Here, we simultaneously recorded**  
27 **polysomnography, iEEG, microwire LFPs, and neuronal spiking activity during**  
28 **wakefulness and sleep in 13 epilepsy patients implanted with clinical depth**  
29 **electrodes, while presenting auditory stimuli (e.g. click-trains, words, music). The**  
30 **results revealed robust spiking and induced LFP high-gamma (80-200Hz) power**  
31 **responses during both NREM and REM sleep across the lateral temporal lobe.**  
32 **The magnitude of the responses was only moderately attenuated in sleep, most**  
33 **notably for late responses beyond the early auditory cortex. Nonetheless, sleep**  
34 **responses maintained their tight locking with soundwave envelopes and their**  
35 **information content was only minimally affected. In contrast, a decrease in LFP**  
36 **alpha-beta (10-30Hz) power responses was prevalent in wakefulness but**  
37 **significantly disrupted in sleep. Entrainment to 40 Hz click-trains was comparable**  
38 **across REM sleep and wakefulness, but reduced in NREM sleep. In conclusion,**  
39 **our results establish the presence of extensive and robust auditory responses**  
40 **during sleep while LFP alpha-beta power decrease, likely reflecting top-down**  
41 **processes<sup>8-10</sup>, is deficient. More broadly, our findings suggest that feedback**  
42 **signalling is key to conscious sensory processing<sup>11-13</sup>.**

43

44 **MAIN**

45

46 The extent to which sleep affects responses along sensory pathways remains unclear.  
47 On one hand, external stimuli in sleep rarely affect perception<sup>14</sup>, suggesting response  
48 attenuation in cortical sensory regions. However, discriminative processing during  
49 sleep does persist for behaviorally-relevant or semantic incongruent stimuli<sup>6,15–17</sup> as  
50 well as for contextual cues in targeted memory reactivation (TMR)<sup>18,19</sup>. Recent animal  
51 studies reporting comparable responses in the primary auditory cortex (A1) across sleep  
52 and wakefulness now challenge the long held assumption that natural sleep, like deep  
53 anesthesia, limits an effective relay to sensory cortex (‘thalamic gating’)<sup>20,212,3,22–24</sup>.  
54 Whether this is also the case in consolidated human sleep remains unknown, since it is  
55 possible that robust auditory responses reflect a sentinel-like process that is unique to  
56 fragmented sleep in prey animals.

57 Previous non-invasive human studies using MEG<sup>5,25</sup>, EEG<sup>26–28</sup>, and fMRI<sup>6,29</sup> have a  
58 number of limitations. Specifically, brief stimulation during sleep elicits a large  
59 stereotypical response (an evoked slow-wave often followed by a sleep spindle) known  
60 as a “K complex” that masks the precise dynamics and limits data interpretation. The  
61 spatial and temporal resolutions of EEG and fMRI, respectively, can not distinguish the  
62 neuronal sources of early (< 150 ms) selective auditory responses from late (~200-  
63 1000 ms) non-specific sleep responses<sup>30</sup>, and determine whether sleep predominantly  
64 affects feedforward or feedback processing.

65 To overcome previous limitations and compare auditory responses in wakefulness and  
66 natural sleep in humans, we recorded intracranial electroencephalogram (iEEG, n = 987  
67 contacts), microwire local field potentials (LFPs, n = 937 microwires), and neuronal  
68 spiking activity (n = 713 clusters) from multiple cortical regions in 13 drug-resistant  
69 epilepsy patients implanted with depth electrodes for clinical monitoring (14 sessions,  
70 including eight full-night sessions lasting  $484.8 \pm 45.99$  min, and six daytime nap  
71 sessions lasting  $103.6 \pm 7.7$  min). At least one depth electrode in each monitored  
72 individual, targeted auditory (or other lateral temporal) cortical regions. We  
73 intermittently presented auditory stimuli including clicks, tones, chords, music, words,  
74 and sentences, via a bedside speaker (Methods) during the same recording session,  
75 while participants were awake or asleep (Fig. 1, Supplementary Table. 1). Sleep/wake  
76 stages were scored according to established guidelines<sup>31</sup> (Fig. 1b, Extended Data Fig.  
77 1) based on full polysomnography including electrooculogram (EOG), electromyogram  
78 (EMG), scalp EEG, and video monitoring whenever possible (n = 7 sessions), as  
79 previously described<sup>32</sup>, or EEG/iEEG and video (n = 7 sessions, (Methods)).

80 We recorded spiking activity from 713 neuronal clusters (Supplementary Table 1), of  
81 which 55 clusters (7.7%) produced a significant auditory response (increased firing rate  
82 compared to baseline,  $p < 0.01$  by Wilcoxon-Mann-Whitney test) to at least one  
83 stimulus in at least one vigilance state (n = 312 responses overall; Fig. 1c,d see  
84 Extended Data Fig. 2 for additional examples). The magnitude of most (66%) spiking  
85 responses was not significantly different between wakefulness and sleep, while the  
86 magnitude was significantly decreased in 28% and significantly increased in 6% (Fig.

87 1e, mean gain: -22.77%). The majority (293/312, 96%) of responses were observed in  
 88 the superior temporal gyrus, but were also detected in other lateral temporal sites such  
 89 as the middle temporal gyrus, as well as in the orbitofrontal cortex (Fig. 1f, Extended  
 90 Data Fig. 3). Responses recorded in the posteromedial Heschl's gyrus, probably  
 91 corresponding functionally to A1<sup>33,34</sup> (n = 236 in 33 neuronal clusters; mean gain = -  
 92 16.45%), were significantly less attenuated than those in regions outside A1 (n = 91 in  
 93 22 neuronal clusters; gain = -37.58%,  $p = 0.00044$  by Wilcoxon-Mann-Whitney test).  
 94 However, most of the responses in both primary and non-primary regions, did not show  
 95 significant attenuation (68% and 62% for A1 and outside A1, respectively). Indeed,  
 96 even outside A1, robust high-fidelity responses persisted, as exemplified by the activity  
 97 of a non-A1 neuronal cluster in response to presentation of an excerpt of Mozart music  
 98 (Supplementary Video 1). Computing mutual information (MI) between the auditory  
 99 stimulus and the spiking response (Methods) revealed a very modest decrease (6.11%,  
 100 Fig.1g) in MI during NREM sleep compared to wakefulness, although this was  
 101 nevertheless highly significant statistically ( $p < 10^{-06}$  by Wilcoxon signed rank test).

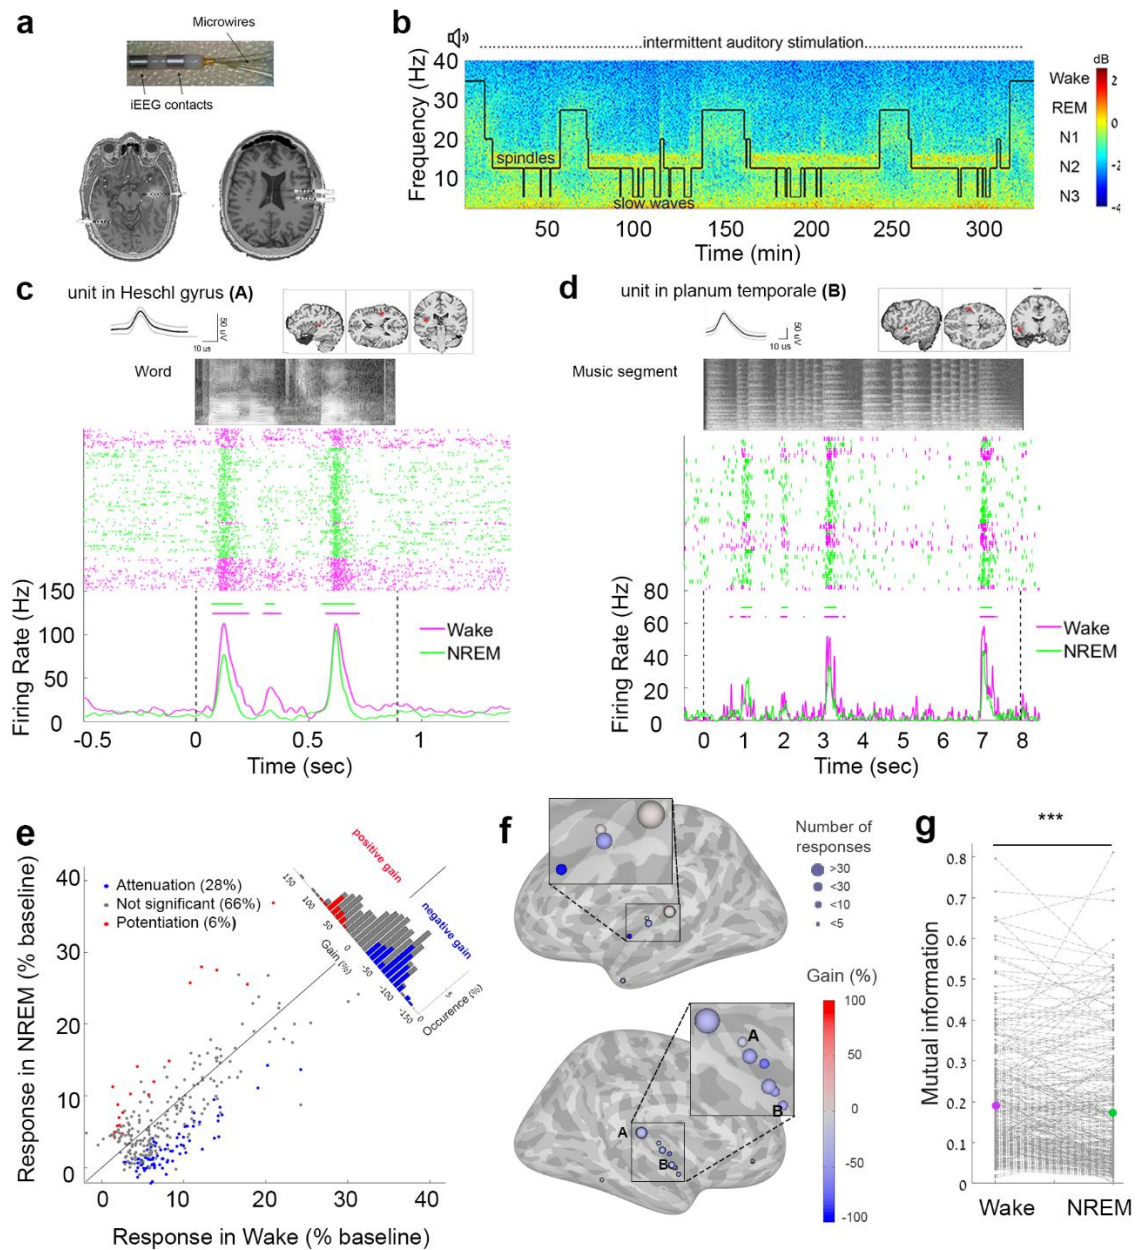

103 **Figure 1. Robust auditory spiking responses across the temporal lobe during**  
104 **NREM sleep.** (a) (top) Depth electrodes (6-12 per patient) implanted in epilepsy  
105 patients for clinical monitoring, each consisting of eight 1.5-mm iEEG contacts along  
106 the shaft and eight 40- $\mu$ m microwires protruding from the distal tip, recording LFP and  
107 spiking activities, (bottom) two representative pre-implant MR images co-registered  
108 with post-implant CT used to localize electrode from the same individual. (b)  
109 Representative time–frequency representation (spectrogram) of iEEG recorded in one  
110 individual during a full-night sleep study with intermittent auditory stimulation. Warm  
111 colors (e.g. red, see color bar on far right) mark increased power in specific time–  
112 frequency windows (frequency shown on left side of y-axis). Superimposed hypnogram  
113 (gray trace) marks the time–course of sleep/wake states (shown on right side of y-axis).  
114 Note that NREM stages N2 and N3 are associated with increased power in spindle (10–  
115 15 Hz) and slow ( $< 4$  Hz) frequency ranges. (c) Representative raster plots and peri-  
116 stimuli histograms (PSTHs) of unit spiking activities in response to auditory stimuli in  
117 the primary auditory cortex. (d) Same as (b) for a unit in higher-order auditory cortex  
118 (planum temporale). In both panels, the top row shows the action potential waveform  
119 (left inset, mean  $\pm$  SD) and the anatomical location of the recorded unit (right inset, red  
120 circle in MRI sections), while the grayscale soundwave spectrograms are shown above  
121 the raster (lighter shades denote stronger power). Pink, wakefulness; Green, NREM  
122 sleep. Vertical dotted black lines mark stimulus onset and offset. Horizontal bars above  
123 PSTH time–courses indicate automatically-detected response intervals for which  
124 response magnitude was compared quantitatively. (e) Scatter plot of magnitude of all  
125 spiking responses to auditory stimuli ( $n = 312$  responses from 55 clusters) in NREM  
126 sleep (y-axis) vs. wakefulness (x-axis), together with a histogram of gain values  
127 comparing response magnitudes (upper-right corner along the unity/zero-gain  
128 diagonal). (f) Gain values of spiking response magnitudes (NREM vs. wakefulness) in  
129 each region exhibiting auditory responses. The location of each circle denotes its  
130 anatomical location shown on a standard (MNI) brain template, the color represents the  
131 average gain detected in that region (color bar on right), and the circle’s size reflects  
132 the number of responses detected in that region. The letters A and B mark the location  
133 of representative units shown in panels A and B. (h) Mutual information (MI) between  
134 stimulus and spiking response ( $n = 312$  responses from 55 neuronal clusters) in  
135 wakefulness (left, pink dot represents the mean) and NREM sleep (right, green dot  
136 represents the mean) reveals a modest (6.11%) reduction in MI during NREM sleep  
137 (\*\*\*)  $p < 0.001$  by signed rank test).

138

139 Since modulations in high-gamma (HG, 80-200 Hz) power are closely linked to  
140 neuronal firing rates in human auditory cortex<sup>35</sup>, we compared auditory-induced power  
141 responses across wakefulness and NREM sleep. The results revealed highly robust  
142 auditory-induced HG responses (Fig. 2a,b; additional examples in Extended Data Fig.  
143 4;  $n = 554$  responses from 74 LFP microwires and 311 responses in 47 iEEG  
144 electrodes). The majority (73%) of HG responses did not significantly differ in  
145 magnitude, although 18% were significantly attenuated in NREM sleep, and 9% were  
146 significantly potentiated (mean gain: -1.78%, Fig. 2c). In contrast to the spike  
147 responses, HG attenuation was higher in A1 (gain = -9.33%,  $n = 310$  responses) than  
148 outside A1 (gain = 2.44%,  $n = 555$  responses,  $p = 1.7 \times 10^{-05}$  by Wilcoxon-Mann-  
149 Whitney test). The relationship of the gamma power envelope to the sound envelope of  
150 auditory stimuli was similar in sleep and wakefulness (Fig. 2e,f; mean correlation  
151 coefficients in wakefulness and sleep:  $r = 0.63$  vs.  $r = 0.61$ ,  $n = 424$  responses in 41 LFP



152 microwires,  $p = 0.72$  by signed-ranked test). Auditory-induced power responses in the  
 153 low-gamma (40-80Hz) range were significantly less attenuated in sleep than HG  
 154 responses and displayed an average potentiation (Extended Data Fig. 5a, mean gain:  
 155 +7.87%). There was a correlation between the sleep gain in each microwire and the  
 156 gain of spiking responses in neuronal clusters identified on the same microwire ( $n = 45$   
 157 LFP channels,  $r = 0.32$  and  $r = 0.39$   $p=0.016$  and  $p=0.005$  for low-gamma, and high-  
 158 gamma, respectively, by random permutations tests, Methods, Extended Data Fig 5c,  
 159 d). A higher response latency was strongly correlated with stronger sleep attenuation  
 160 (Fig. 2g,  $r = 0.8$ ,  $p < 0.001$  by permutation). In addition, late/sustained components of  
 161 the auditory response ( $> 200$  ms) were associated with stronger sleep attenuation than  
 162 early ( $< 200$  ms) response components (Extended Data Fig. 6b, c). Other factors such  
 163 as slow wave and spindle activities were also associated with higher sleep attenuation  
 164 (Extended Data Fig. 6a). Comparing the degree of entrainment to fast stimulus  
 165 modulations as described previously<sup>33</sup>, we found that 40 Hz click trains in wakefulness  
 166 strongly entrained field potentials (Fig. 2h,  $n = 281$  iEEG channels and  $n = 84$  LFP  
 167 microwires, Methods). During NREM sleep, 25% of the iEEG and LFP electrodes  
 168 exhibited significant attenuation compared to wakefulness, indicating a partial  
 169 attenuation in 40 Hz entrainment (mean gain: -23.33%,  $n = 365$  electrodes, Fig. 2i).

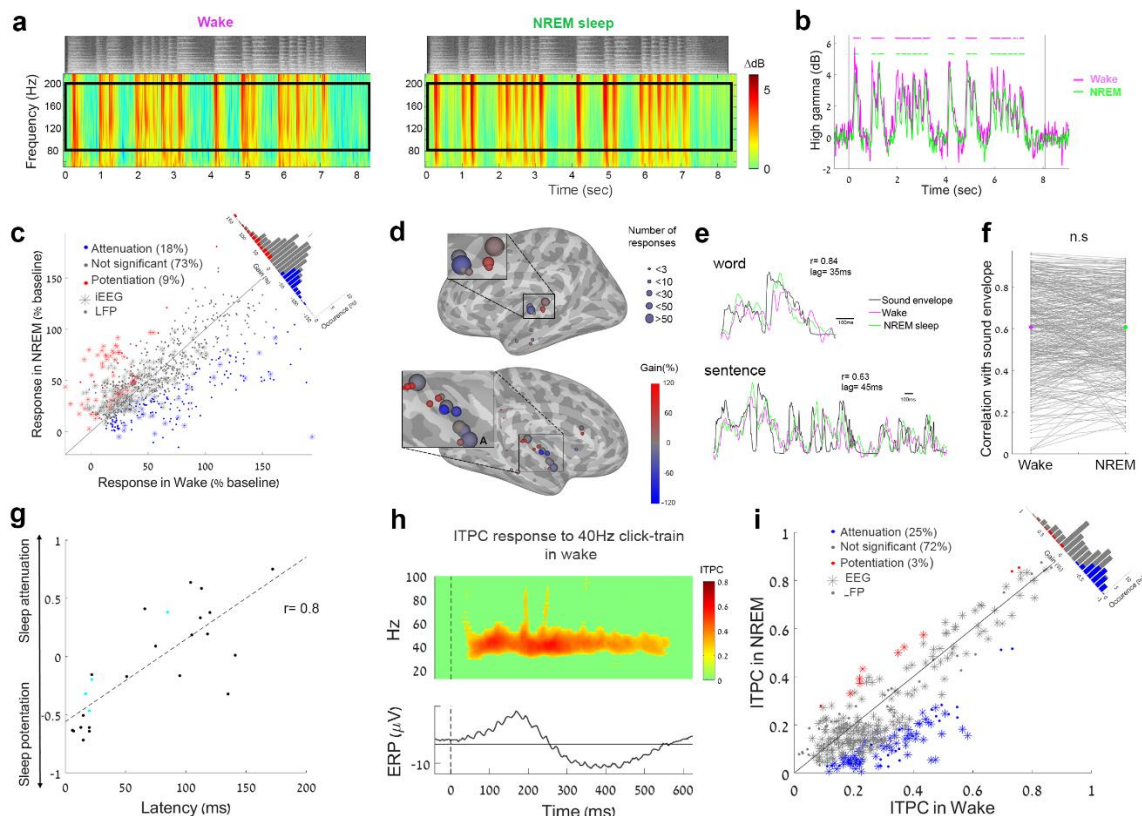

170  
 171 **Figure 2. Robust induced high-gamma auditory responses across the temporal**  
 172 **lobe and partially reduced ITPC during NREM sleep.** (a) Representative  
 173 spectrogram of induced LFP high-frequency ( $> 50$ Hz) power in response to music  
 174 during wakefulness (left) and NREM sleep (right). Warmer colors (e.g. red) denote an  
 175 increase in power (dB scale, color bar on right). Pink and gray rectangles represent  
 176 time-frequency regions-of-interest used for subsequent quantification in wakefulness,  
 177 and sleep, respectively. Grayscale soundwave spectrograms are shown above the LFP  
 178 spectrograms (lighter shades denote stronger power). (b) Time-courses of the mean

179 high gamma (80-200 Hz) responses shown in (A). Pink, wakefulness. Green, NREM  
180 sleep. Horizontal bars above the time-course indicate automatically-detected response  
181 intervals (Methods) for which the magnitude of the responses was compared  
182 quantitatively, Vertical black lines mark stimulus onset and offset. (c) Scatter plot of  
183 all high-gamma response magnitudes (% increase from baseline) to auditory stimuli  
184 ( $n = 556$  responses from 74 LFP microwires and 320 responses from 55 iEEG channels)  
185 in NREM sleep (y-axis) vs. wakefulness (x-axis), together with a histogram of gain  
186 values comparing response magnitude (upper-right corner along the unity diagonal).  
187 (d) High gamma gain values (NREM vs. wakefulness) in each region exhibiting  
188 auditory gamma responses. The location of each circle denotes the anatomical location  
189 shown on a standard (MNI) brain template, while the color represents the average gain  
190 detected in that region (color bar on right), and the circle's size reflects the number of  
191 responses detected in the region. The letter A marks the location of the representative  
192 microwire shown in panel A. (e) Two representative time-courses of LFP high-gamma  
193 responses (pink, wakefulness; green, NREM sleep) showing a tight relationship with  
194 the sound envelope of the auditory stimulus. Black, sound envelope; (f) Robust  
195 correlation between LFP high-gamma responses and the sound envelope is similar in  
196 wakefulness (left, pink dot represents the mean) and NREM sleep (right, green dot  
197 represents the mean;  $n = 424$  responses in 41 microwires;  $p = 0.72$  by signed rank test)  
198 (g) Scatter plot of the degree of response attenuation in NREM sleep (y-axis) vs. latency  
199 of gamma LFP response in each microwire (x-axis;  $n = 25$  microwires, Pearson  
200 correlation coefficient  $r = 0.8$ ,  $p < 0.001$ ). Cyan dots mark individual adjacent  
201 microwires protruding from the same depth electrode exhibiting different sleep  
202 attenuations and latencies. (h) Top, iEEG ITPC (color map) in response to a 40 Hz  
203 click train. Bottom, event-related potential (ERP, black trace) of the same iEEG  
204 channel. (i) Scatter plot of inter-trial phase coherence (ITPC) of 40 Hz iEEG and LFP  
205 responses ( $n = 281$  and 81, respectively) in NREM sleep (y-axis) vs. wakefulness (x-  
206 axis), together with a histogram of gain values comparing ITPC entrainment (along the  
207 diagonal).

208 In humans, sensory responses often manifest as an increase in spiking activity and LFP  
209 HG power, accompanied by a *decrease* in low-frequency power, also termed  
210 'desynchronization' <sup>35-39</sup>. Accordingly, during wakefulness we observed strong  
211 induced alpha-beta (10-30Hz) desynchronization (ABD), i.e. power suppression, in  
212 response to auditory stimuli (Fig. 3a,b; Extended Data Fig. 7). We proceeded to  
213 compare ABD responses ( $n=244$  in 57 LFP microwires and  $n=188$  in 29 iEEG  
214 electrodes) in wakefulness and NREM sleep. In sharp contrast to spiking and LFP HG  
215 responses, most (76%) ABD responses displayed significant attenuation during sleep,  
216 23% did not change significantly, and only 1% were potentiated in sleep (Fig. 3c, mean  
217 gain: -71.84%). Similar results were obtained when considering each session as an  
218 independent variable ( $n = 8$ , mean gain: -56.97%,  $p = 0.004$  by signed-rank test).  
219 Regional analysis (Fig. 3d) revealed that the ABD responses were less attenuated in A1  
220 than outside A1 (mean gain: -41.44% vs. -80.20%; percent channels with significant  
221 ABD attenuation: 45% vs. 84% in A1 or outside A1, respectively,  $p = 7.3 \times 10^{-07}$  by  
222 Wilcoxon-Mann-Whitney test). As observed for the HG responses, a longer latency was  
223 also associated with stronger ABD attenuation (Fig. 3e,  $r = 0.5$ ,  $p < 0.001$ ).

224

225

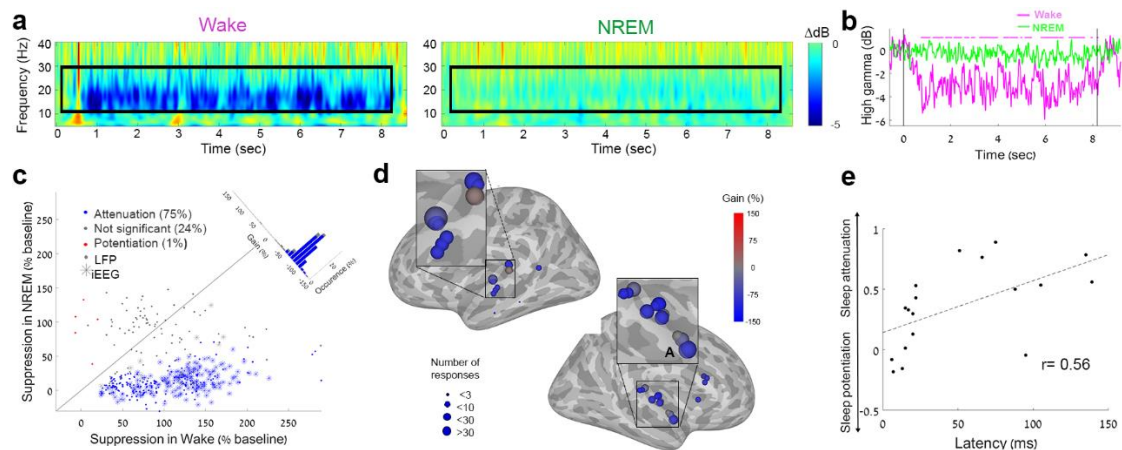

226

227

228 **Figure 3. NREM sleep disrupts auditory-induced LFP alpha-beta power**

229 **decreases.** (a) Representative spectrogram of auditory-induced LFP low-frequency

230 (< 50 Hz) power in response to music during wakefulness (left) and NREM sleep

231 (right). Colder colors (e.g. blue) denote a decrease in power (dB scale, color bar on

232 right). Pink and dark-green rectangles represent time-frequency regions-of-interest used

233 for subsequent quantification in wakefulness, and sleep, respectively. (b) Time-course

234 of induced alpha-beta (10-30 Hz) power dynamics shown in (a). Pink, wakefulness.

235 Green, NREM sleep. Horizontal pink bars above the time-course indicate

236 automatically-detected response intervals (Methods) for which the magnitude of the

237 response was compared quantitatively (significant decreases were not detected in

238 sleep), while vertical black lines mark stimulus onset and offset. (c) Scatter plot of all

239 alpha-beta decrease (ABD) responses (% of baseline decrease) to auditory stimuli

240 ( $n = 244$  responses from 57 LFP channels and  $n = 188$  responses from 29 iEEG

241 channels) in NREM sleep (y-axis) vs. wakefulness (x-axis), together with a histogram

242 of gain values comparing response magnitude (upper-right corner along the unity

243 diagonal). (d) Differences in ABD responses (wakefulness vs. NREM) in each region

244 exhibiting such responses. The location of each circle represents its anatomical location

245 shown on a standard (MNI) brain template, the color reflects the average gain detected

246 in that region (color bar on right), and the circle's size reflects the number of responses

247 detected in the region. The letter A marks the location of the representative microwire

248 shown in panel A. (e) Scatter plot of the difference in ABD (wake-NREM, y-axis) vs.

249 latency of ABD in each microwire (x-axis;  $n = 18$  microwires, Pearson correlation

coefficient  $r = 0.5$ ,  $p < 0.001$ ).

250 Lastly, we examined the auditory responses during REM sleep ( $n = 9$  sessions in 8

251 patients). The results indicated that 85% of spiking responses (Fig. 4a, 141 responses

252 from 25 neuronal clusters) did not significantly differ in magnitude between

253 wakefulness and REM sleep, while the magnitude of 9% significantly decreased, and

254 that of 6% significantly increased (Fig. 4b, mean gain: -16.75%). Similarly, the

255 magnitude of induced HG responses was generally preserved during REM sleep (Fig.

256 4c,  $n = 236$  LFP responses in 33 microwires;  $n = 198$  iEEG responses in 33 electrodes),

257 with 88% of responses with no significant changes, 7% of responses were significantly

258 attenuated, and 5% were significantly potentiated (mean gain: -4.34%). ABD

259 attenuation during REM sleep ( $n = 154$  LFP responses in 32 microwires and  $n = 217$

260 iEEG responses in 36 electrodes) showed a similar pattern to that found in NREM sleep:

261 46% responses were significantly attenuated, and 54% did not show any significant

262 change (Fig. 4d, mean gain: -68.38%). There was significant correlation in the degree

263 of attenuation during NREM and REM sleep in the same electrodes ( $r = 0.57$  for HG



264 responses and  $r = 0.51$  for ABD, respectively,  $p < 0.001$  by permutations, Extended  
 265 Data Fig. 8 a,b). Notwithstanding the similarity between REM sleep and NREM sleep  
 266 in terms of robust HG responses and significant ABD attenuation, entrainment to 40 Hz  
 267 click-trains during REM sleep was not significantly different than that observed during  
 268 wakefulness (Fig. 4d, mean gain: -3.72%,  $n = 242$  iEEG electrodes and 60 LFP  
 269 microwires, Extended Data Fig. 8c). Overall, during REM sleep, spiking responses  
 270 displayed a modest attenuation, the profiles of the LFP/iEEG power responses were  
 271 similar to those during NREM sleep, and 40 Hz entrainment was similar to that  
 272 observed during wakefulness.

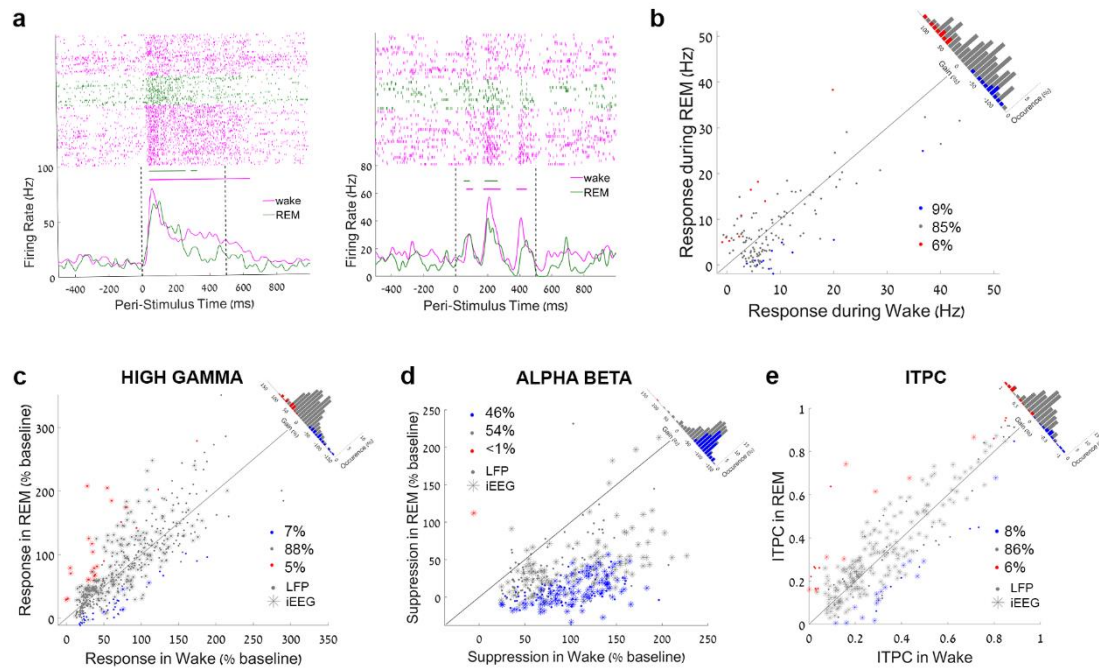

273  
 274 **Figure 4. Auditory responses in REM sleep.** (a) Two representative raster plots and  
 275 peri-stimulus time histograms (PSTHs) of neuronal spiking activities in response to  
 276 auditory stimuli (left: click train; right: word) in the primary auditory cortex. Pink,  
 277 wakefulness; Green, REM sleep. Vertical dotted black lines mark stimulus onset and  
 278 offset. Horizontal bars above the PSTH time-courses indicate automatically-detected  
 279 response intervals (Methods) for which the magnitude of the response was compared  
 280 quantitatively. (b) Scatter plot of all spiking responses to auditory stimuli ( $n = 141$   
 281 responses from 25 clusters in REM sleep (y-axis) vs. wakefulness (x-axis), together  
 282 with a histogram of gain values comparing response magnitude (upper-right corner  
 283 along the unity/zero-gain diagonal). (c) Scatter plot of high-gamma responses (power  
 284 increase) to auditory stimuli ( $n = 236$  LFP responses from 33 channels and 198 iEEG  
 285 responses from 30 channels) in REM sleep (y-axis) vs. wakefulness (x-axis), together  
 286 with a histogram of gain values comparing the magnitude of the responses (upper-right  
 287 corner along the unity diagonal, averaged gain of  $x\%$ ). (d) Scatter plot of all alpha-beta  
 288 responses (power decrease) to auditory stimuli ( $n = 154$  LFP responses from 32  
 289 channels and 217 iEEG responses from 36 channels) in REM sleep (y-axis) vs.  
 290 wakefulness (x-axis), together with a histogram of gain values comparing the  
 291 magnitude of the responses (upper-right corner along the unity diagonal, averaged gain  
 292 of  $-71.7\%$ ). (e) Scatter plot of inter-trial phase coherence (ITPC) of 40 Hz iEEG and  
 293 LFP responses ( $n = 174$  iEEG electrodes and 28 LFP microwires) in REM sleep (y-  
 294 axis) vs. wakefulness (x-axis), together with a histogram of gain values comparing



295 ITPC entrainment (along the diagonal, averaged gain of x %) reveal comparable  
296 entrainment in the two vigilance states.

297 In summary, our results reveal robust neuronal and LFP HG auditory responses during  
298 sleep, well beyond the early auditory cortex. There was no significant attenuation of the  
299 magnitude of response for most responsive clusters/channels. Even the statistically  
300 significant attenuations were moderate in magnitude and more pronounced for late  
301 sustained responses and in regions downstream from A1. Responses during sleep  
302 continued to track the envelope of auditory soundwaves as they did in wakefulness, and  
303 their information content was only minimally reduced compared with that during  
304 wakefulness. In contrast to robust spiking/HG responses, LFP ABD was prevalent in  
305 wakefulness but significantly disrupted during both NREM and REM sleep. Finally,  
306 entrainment of field potentials to fast stimulus modulation rates (40 Hz click-trains) was  
307 reduced during NREM sleep, but comparable across desynchronized states of REM  
308 sleep and wakefulness. Our results establish that extensive and robust auditory  
309 responses persist during sleep while LFP alpha-beta power decrease is disrupted.

310 Some limitations inherent to research with neurosurgical epileptic patients should be  
311 acknowledged, but we do not believe that these play a major role or affect the  
312 conclusions. First, while we cannot entirely rule out the contribution of epileptiform  
313 activity, we carefully removed any epochs including signs of interictal epileptic activity  
314 from the analysis. The highly consistent results observed across patients with different  
315 clinical profiles argue against a major contribution by pathology. Second, the number  
316 of auditory responsive units is limited, but the significant correlation with LFP HG  
317 power modulations (Extended Data Fig. 7c and <sup>40</sup>), allows us to extrapolate and  
318 confidently interpret the LFP HG responses as reflecting local spiking activities, even  
319 when limited in scope (e.g. in REM sleep). Third, we used a passive auditory  
320 stimulation paradigm. This approach could potentially limit the extent of responses  
321 (behavior- and task-related stimuli could drive responses in MTL mnemonic circuits<sup>41</sup>,  
322 not observed here), but importantly, this allowed us to address changes related to sleep  
323 *per-se*, without confounding processes such as reward or attention. Fourth, the  
324 localization of the electrodes did not permit a distinction between cortical layers.

325 Our results demonstrate the presence of robust neuronal and LFP HG power responses  
326 in the early auditory cortex with a similar magnitude of response in sleep and  
327 wakefulness. This is consistent with recent animal <sup>3,4,22,24</sup> and non-invasive human  
328 studies <sup>5,6,25,29</sup>. There was a stronger attenuation during sleep in regions beyond the  
329 auditory cortex and in late sustained responses (Fig. 3g), as recently observed in the  
330 rat<sup>4</sup>. Notwithstanding the attenuation of responses downstream from A1 in some cases,  
331 most responses were not significantly decreased. In addition, spiking and HG exhibited  
332 high-fidelity responses as evidenced by mutual information analysis and tight locking  
333 to soundwave amplitude. Several lines of evidence suggest that the LFP gamma power  
334 responses are likely to represent feedforward (“bottom-up”) processing <sup>8,9,42,43</sup>. Gamma  
335 oscillations are initiated in cortical input layer 4 and propagate to other cortical layers<sup>8</sup>.  
336 In addition, they are more readily observed in supragranular layers where feedforward  
337 projections originate<sup>8,9,42,43</sup>, they propagate from primary sensory regions to  
338 downstream high-level regions<sup>8</sup>, and blocking NMDA receptors and feedback

339 processing boost their power<sup>8</sup>. We therefore interpret our results as representing a  
340 “feedforward sweep”<sup>44</sup> in cortical sensory pathways that is tightly linked to physical  
341 stimulus features, but can not elicit sensory awareness on its own, as is the case in  
342 unconscious<sup>45,46</sup> conditions such as anesthesia<sup>33</sup>.

343 Some aspects of the auditory response in REM sleep resemble those during NREM  
344 sleep, whereas other aspects are more similar to those in wakefulness, thus mirroring  
345 the general notion that REM sleep represents a ‘paradoxical’ hybrid of NREM sleep  
346 and wakefulness. LFP/iEEG induced power changes (HG increase, and ABD) were  
347 similar across sleep states (Fig. 4c,d; Extended Data Fig. 7), whereas time-locked  
348 entrainment to fast stimulus modulation rates (locking to 40 Hz click-trains) was lower  
349 in NREM sleep, but similar across wakefulness and REM sleep (Fig. 2i, Fig. 4e).  
350 Notably, NREM sleep and REM sleep share certain physiological aspects (e.g. low  
351 monoamine neuromodulation and low muscle tone<sup>14</sup>) and phenomenological aspects  
352 (e.g. disconnection from the external environment<sup>14</sup>). Accordingly, some aspects of  
353 altered sensory responses (e.g. robust LFP HG power changes with disrupted LFP ABD  
354 power changes) are also shared across NREM and REM sleep. Other physiological  
355 aspects of REM sleep more resemble those in wakefulness (e.g. high cholinergic tone,  
356 peripheral autonomic activation<sup>14</sup>) and the states also share certain phenomenological  
357 aspects (e.g. the ability to generate conscious experience). Accordingly, certain aspects  
358 of auditory responses, such as successful entrainment to fast stimulus modulation rates,  
359 are similar across REM sleep and wakefulness. Such entrainment is probably supported  
360 by desynchronized cortical activity enabled by high cholinergic tone<sup>47</sup>.

361 Our results point to alpha-beta desynchronization (ABD) as the most significant  
362 difference between sensory processing in wakefulness and sleep. ABD is readily  
363 observed in scalp EEG and intracranially upon auditory stimulation during  
364 wakefulness, even during passive listening<sup>39,48,49</sup>, as well as in other brain regions and  
365 modalities<sup>37,50</sup>. Our results indicate that auditory-induced ABD during wakefulness is  
366 significantly disrupted during sleep (Fig. 3), as in anesthetic-loss of consciousness<sup>33</sup>.  
367 Under conditions examined to date, ABD exhibits high correlation with the degree of  
368 HG (although ABD is more spatially widespread) and the two phenomena can be  
369 parsimoniously described as a change in the exponent  $\chi$  (“slope”) of the  $1/f^\chi$  component  
370 of the spectrum<sup>51</sup>. However, we did not detect a significant correlation between the  
371 degrees to which sleep affected ABD and HG responses in individual electrodes,  
372 indicating that the two phenomena are largely independent<sup>33,39</sup>. A number of studies  
373 implicate ABD in top-down processing. In the macaque, gamma power propagates from  
374 V1 to V4 representing feedforward processing, whereas alpha oscillations propagate  
375 top-down from V4 to V1 mediating feedback processing<sup>8</sup>. Moreover, alpha (8–12 Hz)  
376 and beta (13–30 Hz) oscillations are maximal in infragranular layers<sup>8,9,42</sup> where  
377 feedback connections arise<sup>43</sup>. ABD has also been shown to mediate feedback  
378 processing during visual stimulation<sup>10,52</sup>, is associated with better discrimination  
379 performance in the sensorimotor network<sup>53</sup>, and with the extent of auditory percepts in  
380 an illusory auditory paradigm<sup>54</sup>. The precise source of top-down signals remains  
381 elusive, and may include feedback from distant fronto-parietal regions, high-order  
382 sensory regions, or local recurrent networks in the early sensory cortex.

383 Neuromodulatory systems are also likely to play a role, given their mediation of cortical  
384 desynchronization<sup>47</sup>, sensory perception<sup>55</sup>, and low activity in sleep<sup>56</sup>.

385 Thus, our study suggests that impaired top-down signaling is a key feature of sleep, and  
386 more generally, of loss of consciousness. Indeed, increasing evidence suggests that the  
387 neural mechanisms of anesthetic-induced unconsciousness may involve modulation of  
388 top-down processes<sup>57 58 59</sup>. Anesthesia, and other unconscious states (e.g. vegetative  
389 states<sup>11</sup>), may decouple signaling along apical dendrites of layer 5 pyramidal neurons,  
390 thereby suppressing the influence of feedback arriving at the distal dendrites<sup>13</sup>. In  
391 conclusion, our results point to disrupted top-down signaling as a key feature of sleep,  
392 and to dissociation of feedforward and feedback signaling as a general feature of  
393 unconscious states and sensory disconnection.

394



395 **MAIN REFERENCES**

396

- 397 1. Cirelli, C. & Tononi, G. Is Sleep Essential ? **6**, 1605–1611 (2008).
- 398 2. Hennevin, E., Huetz, C. & Edeline, J. M. Neural representations during sleep:  
399 From sensory processing to memory traces. *Neurobiol. Learn. Mem.* (2007).
- 400 3. Issa, E. B. & Wang, X. Sensory responses during sleep in primate primary and  
401 secondary auditory cortex. *J. Neurosci.* **28**, 14467–80 (2008).
- 402 4. Sela, Y., Krom, A. J., Bergman, L., Regev, N. & Nir, Y. Sleep differentially  
403 affects early and late neuronal responses to sounds in auditory and perirhinal  
404 cortices. *J. Neurosci.* **40**, 2895–2905 (2020).
- 405 5. Strauss, M. *et al.* Disruption of hierarchical predictive coding during sleep.  
406 *Proc. Natl. Acad. Sci.* 201501026 (2015).
- 407 6. Portas, C. M. *et al.* Auditory Processing across the Sleep-Wake Cycle. *Neuron*  
408 **28**, 991–999 (2000).
- 409 7. Andrillon, T., Poulsen, A. T., Hansen, L. K., L É Ger, D. & Kouider, S. Neural  
410 markers of responsiveness to the environment in human sleep. *J. Neurosci.* **36**,  
411 6583–6596 (2016).
- 412 8. Kerkoerle, T. Van, Self, M. W., Dagnino, B., Gariel-mathis, M. & Poort, J.  
413 Alpha and gamma oscillations characterize feedback and feedforward  
414 processing in monkey visual cortex. **111**, 14332–14341 (2014).
- 415 9. Buffalo, E. A., Fries, P., Landman, R., Buschman, T. J. & Desimone, R.  
416 Laminar differences in gamma and alpha coherence in the ventral stream. *Proc.*  
417 *Natl. Acad. Sci. U. S. A.* **108**, 11262–11267 (2011).
- 418 10. Bastos, A. M. *et al.* Visual areas exert feedforward and feedback influences  
419 through distinct frequency channels. *Neuron* **85**, 390–401 (2015).
- 420 11. Boly, M. *et al.* Preserved Feedforward But Impaired Top-Down Processes in  
421 the Vegetative State. *Science (80-. )*. **332**, 858–862 (2011).
- 422 12. Mashour, G. A. & Hudetz, A. G. Bottom-up and top-down mechanisms of  
423 general anesthetics modulate different dimensions of consciousness. *Front.*  
424 *Neural Circuits* **11**, 1–6 (2017).
- 425 13. Suzuki, M. & Larkum, M. E. General Anesthesia Decouples Cortical Pyramidal  
426 Neurons. *Cell* **180**, 666-676.e13 (2020).
- 427 14. Nir, Y. & Tononi, G. Dreaming and the brain: from phenomenology to  
428 neurophysiology. *Trends Cogn. Sci.* **14**, 88–100 (2010).
- 429 15. Perrin, F., Garcõ, L. & Mauguie, È. A differential brain response to the subject  
430 ' s own name persists during sleep q. **110**, 2153–2164 (1999).
- 431 16. Blume, C., del Giudice, R., Wislowska, M., Heib, D. P. J. & Schabus, M.  
432 Standing sentinel during human sleep: Continued evaluation of environmental  
433 stimuli in the absence of consciousness. *Neuroimage* **178**, 638–648 (2018).
- 434 17. Blume, C. *et al.* Preferential processing of emotionally and self-relevant stimuli  
435 persists in unconscious N2 sleep. *Brain Lang.* **167**, 72–82 (2017).

- 436 18. Bar, E. *et al.* Local Targeted Memory Reactivation in Human Sleep. *Curr. Biol.*  
437 **30**, 1435-1446.e5 (2020).
- 438 19. Rasch, B., Buchel, C., Gais, S. & Born, J. Odor Cues During Slow-Wave Sleep  
439 Prompt Declarative Memory Consolidation. *Science (80-. )*. **315**, 1426–1429  
440 (2007).
- 441 20. Mariotti, M., Formenti, a & Mancina, M. Responses of VPL thalamic neurones  
442 to peripheral stimulation in wakefulness and sleep. *Neurosci. Lett.* **102**, 70–5  
443 (1989).
- 444 21. McCormick, D. a. & Bal, T. Sensory gating mechanisms of the thalamus. *Curr.*  
445 *Opin. Neurobiol.* **4**, 550–556 (1994).
- 446 22. Peña, J. L., Pérez-Perera, L., Bouvier, M. & Velluti, R. A. Sleep and  
447 wakefulness modulation of the neuronal firing in the auditory cortex of the  
448 guinea pig. *Brain Res.* (1999).
- 449 23. Sela, Y., Vyazovskiy, V. V, Cirelli, C., Tononi, G. & Nir, Y. Responses in Rat  
450 Core Auditory Cortex are Preserved during Sleep Spindle Oscillations. *Sleep*  
451 **39**, 1069–1082 (2016).
- 452 24. Nir, Y., Vyazovskiy, V. V, Cirelli, C., Banks, M. I. & Tononi, G. Auditory  
453 Responses and Stimulus-Specific Adaptation in Rat Auditory Cortex are  
454 Preserved Across NREM and REM Sleep. *Cereb. Cortex* **25**, 1362–1378  
455 (2013).
- 456 25. Kakigi, R. *et al.* Sensory perception during sleep in humans: a  
457 magnetoencephalographic study. *Sleep Med.* **4**, 493–507 (2003).
- 458 26. Makov, S. *et al.* Sleep Disrupts High-Level Speech Parsing Despite Significant  
459 Basic Auditory Processing. *J. Neurosci.* **37**, 7772–7781 (2017).
- 460 27. Sharon, O. & Nir, Y. Attenuated Fast Steady-State Visual Evoked Potentials  
461 During Human Sleep. *Cereb. Cortex* **28**, 1297–1311 (2017).
- 462 28. Legendre, G., Andrillon, T., Koroma, M. & Kouider, S. Sleepers track  
463 informative speech in a multitalker environment. *Nat. Hum. Behav.*
- 464 29. Wilf, M., Ramot, M., Furman-haran, E., Arzi, A. & Levkovitz, Y. Diminished  
465 Auditory Responses during NREM Sleep Correlate with the Hierarchy of  
466 Language Processing. 1–21 (2016).
- 467 30. Riedner, B. A., Hulse, B. K., Murphy, M. J., Ferrarelli, F. & Tononi, G.  
468 Temporal dynamics of cortical sources underlying spontaneous and  
469 peripherally evoked slow waves. in *Area* 201–218 (2011).
- 470 31. Berry, R. B. *et al.* The AASM Manual for the Scoring of Sleep and Associated  
471 Events. *Am. Acad. Sleep Med.* **53**, 1689–1699 (2013).
- 472 32. Nir, Y. *et al.* Regional Slow Waves and Spindles in Human Sleep. *Neuron* **70**,  
473 153–169 (2011).
- 474 33. Krom, A. J. *et al.* Anesthesia-induced loss of consciousness disrupts auditory  
475 responses beyond primary cortex. *Proc. Natl. Acad. Sci. U. S. A.* **117**, (2020).
- 476 34. Moerel, M., De Martino, F. & Formisano, E. An anatomical and functional  
477 topography of human auditory cortical areas. *Front. Neurosci.* **8**, 1–14 (2014).

- 478 35. Nir, Y. *et al.* Coupling between Neuronal Firing Rate, Gamma LFP, and BOLD  
479 fMRI Is Related to Interneuronal Correlations. *Curr. Biol.* **17**, 1275–1285  
480 (2007).
- 481 36. Edwards, E. *et al.* Comparison of time-frequency responses and the event-  
482 related potential to auditory speech stimuli in human cortex. *J. Neurophysiol.*  
483 **102**, 377–386 (2009).
- 484 37. Fisch, L. *et al.* Neural “Ignition”: Enhanced Activation Linked to Perceptual  
485 Awareness in Human Ventral Stream Visual Cortex Kipervasser5,6,. *Neuron*  
486 **64**, 562–574 (2010).
- 487 38. Pfurtscheller, G. & Aranibar, A. Event-related cortical desynchronization  
488 detected by power measurements of scalp EEG. *Electroencephalogr. Clin.*  
489 *Neurophysiol.* **42**, 817–826 (1977).
- 490 39. Billig, A. J. *et al.* A Sound-Sensitive Source of Alpha Oscillations in Human  
491 Non-Primary Auditory Cortex. *J. Neurosci.* **39**, 8679–8689 (2019).
- 492 40. Nir, Y. *et al.* Coupling between Neuronal Firing Rate, Gamma LFP, and BOLD  
493 fMRI Is Related to Interneuronal Correlations. *Curr. Biol.* **17**, 1275–1285  
494 (2007).
- 495 41. Rothschild, G., Eban, E. & Frank, L. M. A cortical–hippocampal–cortical loop  
496 of information processing during memory consolidation. *Nat. Neurosci.* **20**,  
497 251–259 (2017).
- 498 42. Von Stein, A., Chiang, C. & König, P. Top-down processing mediated by  
499 interareal synchronization. *Proc. Natl. Acad. Sci. U. S. A.* **97**, 14748–14753  
500 (2000).
- 501 43. Felleman, D. J. & Van Essen, D. C. Distributed hierarchical processing in the  
502 primate cerebral cortex. *Cereb. Cortex* **1**, 1–47 (1991).
- 503 44. Lamme, V. A. F. & Roelfsema, P. R. The distinct modes of vision offered by  
504 feedforward and recurrent processing. *Trends Neurosci.* **23**, 571–579 (2000).
- 505 45. Koch, C., Massimini, M., Boly, M. & Tononi, G. Neural correlates of  
506 consciousness: Progress and problems. *Nat. Rev. Neurosci.* **17**, 307–321  
507 (2016).
- 508 46. Rees, G., Kreiman, G. & Koch, C. Neural correlates of consciousness in  
509 humans. *Nat. Rev. Neurosci.* **3**, 261–270 (2002).
- 510 47. Pinto, L. *et al.* Fast modulation of visual perception by basal forebrain  
511 cholinergic neurons. *Nat. Neurosci.* **16**, 1857–63 (2013).
- 512 48. Edwards, E. *et al.* Comparison of Time–Frequency Responses and the Event-  
513 Related Potential to Auditory Speech Stimuli in Human Cortex. *J.*  
514 *Neurophysiol.* **102**, 377–386 (2009).
- 515 49. Canolty, R. T. *et al.* Spatiotemporal dynamics of word processing in the human  
516 brain. *Front Neurosci* **1**, 185–196 (2007).
- 517 50. Miller, K. J., Zanos, S., Fetz, E. E., Den Nijs, M. & Ojemann, J. G. Decoupling  
518 the cortical power spectrum reveals real-time representation of individual  
519 finger movements in humans. *J. Neurosci.* **29**, 3132–3137 (2009).



- 520 51. Podvalny, E. *et al.* A unifying principle underlying the extracellular field  
521 potential spectral responses in the human cortex. *J. Neurophysiol.* **114**, 505–  
522 519 (2015).
- 523 52. Michalareas, G. *et al.* Alpha-Beta and Gamma Rhythms Subserve Feedback  
524 and Feedforward Influences among Human Visual Cortical Areas. *Neuron* **89**,  
525 384–397 (2016).
- 526 53. Haegens, S., Nácher, V., Luna, R., Romo, R. & Jensen, O.  $\alpha$ -Oscillations in the  
527 monkey sensorimotor network influence discrimination performance by  
528 rhythmical inhibition of neuronal spiking. *Proc. Natl. Acad. Sci. U. S. A.* **108**,  
529 19377–19382 (2011).
- 530 54. Leske, S. *et al.* The strength of alpha and beta oscillations parametrically scale  
531 with the strength of an illusory auditory percept. *Neuroimage* **88**, 69–78 (2014).
- 532 55. Gelbard-sagiv, H., Magidov, E., Sharon, H., Hendler, T. & Nir, Y.  
533 Noradrenaline Modulates Visual Perception and Late Article Noradrenaline  
534 Modulates Visual Perception and Late Visually Evoked Activity. *Curr. Biol.*  
535 **28**, 2239-2248.e6 (2018).
- 536 56. Hayat, H. *et al.* Locus coeruleus norepinephrine activity mediates sensory-  
537 evoked awakenings from sleep. *Sci. Adv.* **6**, (2020).
- 538 57. Mashour, G. A. Top-down mechanisms of anesthetic-induced unconsciousness.  
539 *Front. Syst. Neurosci.* **8**, 1–10 (2014).
- 540 58. Raz, A. *et al.* Preferential effect of isoflurane on top-down vs. bottom-up  
541 pathways in sensory cortex. *Front. Syst. Neurosci.* **8**, 1–22 (2014).
- 542 59. Lee, U. *et al.* Disruption of Frontal – Parietal Communication. *Anesthesiology*  
543 **118**, 1264–1275 (2013).

544

545

546

## 547 **METHODS**

### 548 Patients

549 Thirteen drug-resistant epilepsy patients (five females) were implanted with Behnke-  
550 Fried depth electrodes (Ad-tech)<sup>60</sup> as part of their clinical pre-surgical evaluation to  
551 identify seizure foci for potential surgical treatment. Electrode locations were based  
552 solely on clinical criteria. All patients provided written informed consent to participate  
553 in the research study, under the approval of the Institutional Review Board at the Tel  
554 Aviv Sourasky Medical Center (TASMC, 9 patients), or the Medical Institutional  
555 Review Board at UCLA (4 patients). In total, 14 sessions (6 naps / 8 nights) were  
556 recorded.

### 557 Auditory stimulation

558 Auditory stimuli were delivered intermittently using a bed-side speaker during naps or  
559 full night sessions, where each recording session included periods of both wakefulness  
560 and sleep. Auditory stimuli were presented in a pseudo-random order, with the sound  
561 intensity level adjusted at the start of each session to be comfortably audible but not too  
562 loud, so the patients could sleep comfortably. Stimuli included 40 Hz click-trains, tone  
563 sequences, words, sentences, and music sequences [duration range: 0.5 s–9.4 s]. Word  
564 stimuli were compiled in English at UCLA and in Hebrew at TASMC.

### 565 Sleep staging

566 Full polysomnography (scalp EEG, EOG, EMG, and video) was recorded in seven  
567 sessions (three nights / four naps). Epochs were scored as wakefulness (W),  
568 N1/unknown, N2, N3, and REM sleep according to established guidelines<sup>31</sup>. In three  
569 sessions (2 nights / 1 nap), only the scalp EEG signal was recorded together with  
570 intracranial data. In these cases, sleep scoring was performed using the scalp EEG,  
571 confirmed by visualization of iEEG spectrograms and video recordings. Periods scored  
572 as N2 and N3 displayed high levels of SWA and sigma (sleep spindle) activity, whereas  
573 periods of wakefulness and REM sleep were associated with low levels of SWA. For  
574 four sessions (two nights & two naps), sleep scoring was based on iEEGs and video  
575 recordings. We calculated time-frequency dynamics of the iEEG (spectrograms) using  
576 a 30 s window (without overlap) spanning frequencies from 0 to 40 Hz and averaged  
577 the power in the delta band (0.5–4 Hz). Epochs with delta power higher than the 55<sup>th</sup>  
578 percentile were scored as NREM sleep and those with delta power lower than the 20<sup>th</sup>  
579 percentile, were scored as wakefulness/REM sleep and were further subdivided as:  
580 epochs where the video showed that the patient was awake (eyes open, moving, sitting)  
581 were scored as wakefulness. Long periods (> 3min) occurring during the second part of  
582 the night, where the video indicated that the patient was likely to be asleep (closed eyes,  
583 no movements), were scored as REM sleep. To further validate sleep scoring based  
584 solely on iEEG, we compared our automatic sleep scoring to manual scoring in the  
585 overnight sessions with full polysomnography (PSG). The results indicated that  
586  $81.47 \pm 12.36\%$ ,  $88.33 \pm 6.68\%$ , and  $84.44 \pm 6.51\%$  ( $n = 4$  nights) of the epochs scored  
587 by automatic scoring as wake, NREM sleep and REM sleep, respectively, agreed with  
588 the scoring labels obtained by full PSG.

## 589 Electrophysiology

590 Each depth electrode had eight platinum iEEG contacts along the shaft (referenced to  
591 the scalp), together with eight micro-wires protruding 3-5 mm from the distal tip, and  
592 a 9<sup>th</sup> low-impedance reference microwire<sup>60</sup> that served as referenced for each  
593 microwire electrode bundle. Data were recorded using either Blackrock (Salt Lake City,  
594 UT, USA, 30 kHz sampling rate) or Neuralynx (Bozeman, MT, USA, 40 kHz sampling  
595 rate) data acquisition systems.

## 596 Spike sorting

597 Neuronal clusters were identified using the ‘waveclus’ software package<sup>61</sup> as described  
598 previously<sup>62,63</sup>: extracellular recordings were high-pass filtered above 300 Hz and a  
599 threshold of 5 standard deviations above the median noise level was computed.  
600 Detected events were clustered (or categorized as noise) using automatic  
601 superparamagnetic clustering of wavelet coefficients, followed by manual refinement  
602 based on the consistency of spike waveforms and inter-spike interval distributions.

## 603 Detection of significant responses.

604 We identified neuronal auditory responses as described previously<sup>4</sup>. First, the response  
605 in each trial was smoothed by convolution with a Gaussian kernel ( $\sigma = 10$  ms). Next, a  
606 one tailed Wilcoxon-Mann-Whitney test was used to compare the results across trials.  
607 Each millisecond (within an interval corresponding to the stimulus duration + 100 ms  
608 following it) was compared against baseline activity (we corrected for the multiple  
609 comparisons using False-Discovery-Rate<sup>64</sup> with base alpha of 0.01). A minimum of six  
610 trials per condition (wakefulness or sleep states) was required. Components shorter than  
611 5 ms were excluded, and undetected intervals shorter than 2 ms that preceded and  
612 followed responses were categorized as misses and bridged with adjacent intervals. To  
613 further reduce the risk of false detections, the total length of the response for each  
614 stimulus had to be greater than 1.5% of the stimulus length. Responses were normalized  
615 by subtracting the pre-stimulus baseline (0-500 ms) activity in each state (baseline  
616 normalization).

## 617 Mutual Information Analysis

618 To estimate how informative the spiking response of each unit was with respect to the  
619 set of temporally dynamic stimuli (various words, click-trains, music segments, and  
620 tones), we divided each stimulus into 50 ms bins and calculated the number of spikes  
621 per bin for each trial and stimulus (e.g. a word of 450 ms duration was segmented to  
622 nine consecutive bins). We then pooled together the bins of all stimuli and calculated  
623 the mutual information between the two discrete variables of spikes count in each bin  
624 ( $r$ , response) and the bin identity ( $s$ , stimulus):

$$625 \quad I(r; s) = \sum_r \sum_s p(r, s) * \log\left(\frac{p(r, s)}{p(r) * p(s)}\right)$$

626 When comparing the mutual information between different behavioral states, the  
627 number of trials for each stimulus was equalized across states. Qualitatively similar



628 results were obtained for 20, 50 and 100 ms bins, suggesting that the choice of a 50 ms  
629 bin size did not affect the results.

### 630 LFP and iEEG power analysis

631 Signals from macro- and micro-electrodes were down-sampled to 1 kHz and band-pass  
632 filtered between 40-80 Hz, 80-200 Hz, and 10-30 Hz for low gamma, high gamma, and  
633 alpha-beta frequency bands, respectively. They were then Hilbert-transformed to obtain  
634 the instantaneous amplitude envelope, and log converted to express their amplitude in  
635 dB. For each channel and frequency band, the baseline power was extracted from a 500  
636 ms interval before trial onset, and the mean baseline power was subtracted from the  
637 response power, separately for each frequency-band of interest and separately for each  
638 channel. Trials with power higher than 5 std from the mean were excluded.

639 Time intervals associated with significant induced LFP power in response to auditory  
640 stimuli were detected with the same method described above for the neuronal response.  
641 For LFP responses, response components shorter than 10 ms for low and high gamma  
642 (and 50 ms for alpha-beta) were excluded, and undetected intervals shorter than 4 ms  
643 that preceded and followed responses were categorized as misses and bridged with  
644 adjacent intervals. All responses were also inspected visually to rule out false automatic  
645 detections. These parameters were optimized after extensive visual inspection of  
646 automatic response detections; importantly, none of the results reported were dependent  
647 on the precise parameters used for response detection.

648 For latency analysis, the same automatic algorithm was applied on low-gamma filtered  
649 channels that exhibited a significant response to 40 Hz click-trains during the first  
650 200 ms of the response interval. The first time point in this interval that showed  
651 significantly higher activity than baseline was defined as the response latency.

### 652 Comparison across vigilance states (LFP analysis and spiking activity)

653 For each stimulus and pair of states to be compared (e.g. wakefulness vs. NREM sleep),  
654 we separately identified temporal intervals with significant responses in either state as  
655 described previously<sup>4</sup>. A two tailed Wilcoxon-Mann-Whitney test was used to compare  
656 the response in wake and sleep (alpha of 0.01) for each stimulus.

657 We quantified the relation between response magnitudes in wakefulness and sleep using  
658 a gain factor as described previously<sup>3,4,24,33</sup>, after normalizing each response to the  
659 baseline of that state:

660 
$$Gain = \frac{R_{sleep} - R_{Awake}}{\max(|R_{sleep}|, |R_{Awake}|)} * 100$$
 where  $R_{Sleep}$  and  $R_{Awake}$  are the response  
661 amplitudes for a specific cluster/channel during wakefulness or sleep.

662 To compare response magnitudes between vigilance states per neuronal cluster (spikes)  
663 or channel (LFP/iEEG) (see Extended Data Fig. 5c,d), we combined the responses from  
664 all stimuli (same number of trials per stimulus), and then calculated the mean response  
665 for each channel/neuronal cluster in each state (wake/NREM sleep).

### 666 Analysis of correlation with soundwave envelope

667 LFP microwires with gamma band power modulations that displayed a significant  
668 response, were further analyzed to quantify their correlation with soundwave envelope  
669 (intensity dynamics). The soundwave envelope was extracted by calculating the  
670 running average of the square amplitude using a 5 ms window (without overlap). The  
671 high gamma response was down-sampled to 200 Hz. We first identified, using cross-  
672 correlation, the temporal lag associated with the highest correlation. This was followed  
673 by calculation of the Pearson correlation between the response time-course and the  
674 soundwave envelope at this time lag, and analysis of the statistical significance using  
675 permutations ( $p < 0.01$ ).

#### 676 Inter-trial phase coherence (ITPC) analysis of responses to 40 Hz click-trains

677 Responses to 40 Hz click-train were quantified using inter-trial phase coherence  
678 (ITPC), calculated as described previously<sup>33</sup>. Briefly, ITPC was defined as:  $ITPC =$   
679  $|\frac{1}{N} \sum_{k=1}^N e^{i\phi_k}|$  where N represents the number of trials and  $\phi_k$  the phase of the spectral  
680 estimate for trial k for the 40 Hz frequency.

#### 681 Slow wave activity and sigma power analysis

682 For each session, we calculated the power spectrum of the scalp EEG in the 2 s interval  
683 preceding stimulus onset (or iEEG), and extracted the slow wave activity (SWA, 0.5-  
684 4 Hz) and the sigma power (10-16 Hz). For each stimulus eliciting a significant  
685 response, we sorted the trials according SWA and separated trials occurring during low  
686 SWA (below the 20th percentile) or during high SWA (above the 80th percentile). A  
687 minimum of 10 trials in each category was required to include a specific channel in this  
688 analysis. We then compared the response for each stimulus between the two groups by  
689 Mann-Whitney tests.

#### 690 Electrode localization

691 Pre-implant MRI scans (Siemens Prisma scanner or Magnetom Skyra or GE Signa  
692 scanner, 3T, T1 sequence, resolution 1 mm × 1 mm × 1 mm or 1 mm × 1 mm × 5 mm)  
693 were co-registered with post-implant computed tomography (CT) scans (Philips  
694 MX8000 or Brilliance or Siemens Sensation-64, resolution 1.5 mm × 0.5 mm × 0.5 mm  
695 or 0.75 mm × 0.5 mm × 0.5 mm) to identify the locations of the electrodes. Individual  
696 subject data were further transformed into brain average space to facilitate the  
697 simultaneous visualization of electrode positions in different individuals. Co-  
698 registration and localization were estimated by using FreeSurfer<sup>65</sup> and BioImage<sup>66</sup>  
699 software, according to the guidelines of iELVIS<sup>67</sup>.

700

701 **METHODS REFERENCES**

702

- 703 60. Fried, I. *et al.* Cerebral microdialysis combined with single-neuron and  
704 electroencephalographic recording in neurosurgical patients. Technical note. *J.*  
705 *Neurosurg.* **91**, 697–705 (1999).
- 706 61. Chaure, F. J., Rey, H. G. & Quian Quiroga, R. A novel and fully automatic  
707 spike-sorting implementation with variable number of features. *J.*  
708 *Neurophysiol.* **120**, 1859–1871 (2018).
- 709 62. Nir, Y. *et al.* Regional Slow Waves and Spindles in Human Sleep. *Neuron* **70**,  
710 153–169 (2011).
- 711 63. Nir, Y. *et al.* Selective neuronal lapses precede human cognitive lapses  
712 following sleep deprivation. *Nat. Med.* **23**, 1474–1480 (2017).
- 713 64. Benjamini, Y. & Yekutieli, D. The control of the false discovery rate in  
714 multiple testing under dependency. *Ann. Stat.* **29**, 1165–1188 (2001).
- 715 65. Fischl, B. FreeSurfer. *Neuroimage* **62**, 774–781 (2012).
- 716 66. Papademetris, X. *et al.* BioImage Suite: An integrated medical image analysis  
717 suite: An update. *Insight J.* **2006**, 209 (2006).
- 718 67. Groppe, D. M. *et al.* iELVis: An open source MATLAB toolbox for localizing  
719 and visualizing human intracranial electrode data. *J. Neurosci. Methods* **281**,  
720 40–48 (2017).

721

722

723 **ACKNOWLEDGEMENTS**

724 Supported by the Israel Science Foundation (ISF) grants 1326/15 (YN), 762/16 (AJK),  
725 and 51/11 (I-CORE cognitive sciences; YN), National Science Foundation & US-Israel  
726 Binational Science Foundation (NSF-BSF) grant 2017628 (IF and YN), the Adelis  
727 Foundation (YN), the European Research Council (ERC-2019-CoG 864353; YN), the  
728 European Society of Anesthesiology (AJK) and by an Azrieli Foundation fellowship  
729 award (Y.S). We thank Michelle Tran, Guldamlä Kalender and Natalie Cherry for  
730 assistance at UCLA, Yitzhak Norman for iELSVIS training, Maya Geva-Sagiv for  
731 helpful comments and all Nir lab members for discussions.

732

733 **AUTHOR CONTRIBUTIONS**

734 Y.N. and I.F. conceived research and secured funding. H.H., A.M. and A.J.K. designed  
735 experiments and collected data. H.H, A.M., A.J.K and Y.S analyzed data, supervised  
736 by Y.N.. I.F. and I.S. performed surgeries. F.F. supervised clinical care at TAMSC and  
737 analyzed epilepsy profiles. A.T. managed clinical electrophysiology setup. H.H., A.M.,  
738 and Y.N. wrote the manuscript. All authors provided ongoing critical review of results  
739 and commented on the manuscript.

740

741 **COMPETING INTEREST DECLARATION**

742 The authors declare that they have no competing interests.

743

744 **DATA AVAILABILITY**

745 Data sets supporting the findings of this paper are available on request from the  
746 corresponding authors.

747

748 **CODE AVAILABILITY**

749 Data sets supporting the findings of this paper are available on request from the  
750 corresponding authors.

751



752 **EXTENDED DATA AND FIGURES**

753

| Patient                                        | 472                                 | 479                             | 505                                                                      | 489                                                                  | D009                           | D011<br>2 sessions              | D013                            | D014                            | D017                            | D018                            | D023                            | D025                                   | D026                            |
|------------------------------------------------|-------------------------------------|---------------------------------|--------------------------------------------------------------------------|----------------------------------------------------------------------|--------------------------------|---------------------------------|---------------------------------|---------------------------------|---------------------------------|---------------------------------|---------------------------------|----------------------------------------|---------------------------------|
| Session                                        | Nap                                 | Nap                             | Nap                                                                      | Nap                                                                  | Nap                            | Night                           | Night                           | Night                           | Night                           | Nap                             | Night                           | Night                                  | Night                           |
| Gender                                         | F                                   | M                               | M                                                                        | F                                                                    | F                              | F                               | M                               | M                               | M                               | M                               | W                               | M                                      | M                               |
| Age                                            | 43                                  | 35                              | 35                                                                       | 47                                                                   | 24                             | 25                              | 35                              | 28                              | 39                              | 29                              | 34                              | 17                                     | 27                              |
| Location                                       | UCLA                                | UCLA                            | UCLA                                                                     | UCLA                                                                 | TASMC                          | TASMC                           | TASMC                           | TASMC                           | TASMC                           | TASMC                           | TASMC                           | TASMC                                  | TASMC                           |
| Seizure Onset Zone                             | right OF and left anterior temporal | Mostly temporal                 | left anterior fusiform gyrus and second connected to left oblique insula | Left mesial temporal lobe (LEC), with one seizure in the lateral RAH | Right temporal / frontal lobes | Right superior frontal gyrus    | Right temporal tip              | Left mesial frontal             | zone unclear                    | Right frontal lobe              | Right posterior mesial temporal | Right anterior superior temporal gyrus | Right orbito-frontal            |
| Stimuli                                        | Words, music, sentence 40 Hz CT     | Words, music, sentence 40 Hz CT | Words, music, sentence 40 Hz CT                                          | Words, music, sentence 40 Hz CT                                      | Words, 40Hz CT                 | Words, music, sentence 40 Hz CT | Words, music, sentence 40 Hz CT | Words, music, sentence 40 Hz CT | Words, music, sentence 40 Hz CT | Words, music, sentence 40 Hz CT | Words, music, sentence 40 Hz CT | Words, music, sentence 40 Hz CT        | Words, music, sentence 40 Hz CT |
| Language                                       | English                             | English                         | English                                                                  | English                                                              | Hebrew                         | Hebrew                          | Hebrew                          | Hebrew                          | Hebrew                          | Hebrew                          | Hebrew                          | Hebrew                                 | Hebrew                          |
| Total N. of units                              | 74                                  | 150                             | 102                                                                      |                                                                      | 62                             | 45                              | 0                               | 0                               | 55                              | 60                              | 83                              | 58                                     | 24                              |
| N. of responsive units                         | 7                                   | 25                              | 14                                                                       | 5                                                                    | 1                              | 2                               | 0                               | 0                               | 1                               | 0                               | 0                               | 0                                      | 0                               |
| N. of responsive HG (LFP / iEEG)               | 6 (0)                               | 24 (14)                         | 16 (0)                                                                   | 14 (0)                                                               | 4 (5)                          | 10 (7)                          | 0 (1)                           | 0 (0)                           | 0 (0)                           | 0 (0)                           | 0 (10)                          | 0 (0)                                  | 0 (0)                           |
| N. of responsive ABD (LFP / iEEG)              | 4 (0)                               | 16 (10)                         | 12 (0)                                                                   | 2 (0)                                                                | 7 (7)                          | 12 (11)                         | 0 (7)                           | 0 (0)                           | 0 (7)                           | 0 (0)                           | 0 (0)                           | 0 (0)                                  | 0 (0)                           |
| N. of responsive ITPC to 40 Hz CT (LFP / iEEG) | 1 (2)                               | 57 (25)                         | 3 (10)                                                                   | 24 (11)                                                              | 11 (1)                         | 39 (13)                         | 40 (5)                          | 1 (1)                           | 1 (2)                           | 27 (0)                          | 47 (10)                         | 26 (2)                                 | 4 (2)                           |

754

755 **Supplementary Table 1. Data acquisition details**

756 Data acquisition details for the nine recording sessions included in this study. Patients  
 757 d009 and d011 refer to the same individual who was re-admitted with new electrode  
 758 locations due to inconclusive clinical results from the first hospital admission.  
 759 Abbreviations: UCLA= University of California Los Angeles, TASMC=Tel Aviv  
 760 Sourasky Medical Center, 40 Hz CT= 40 Hz click-train

761

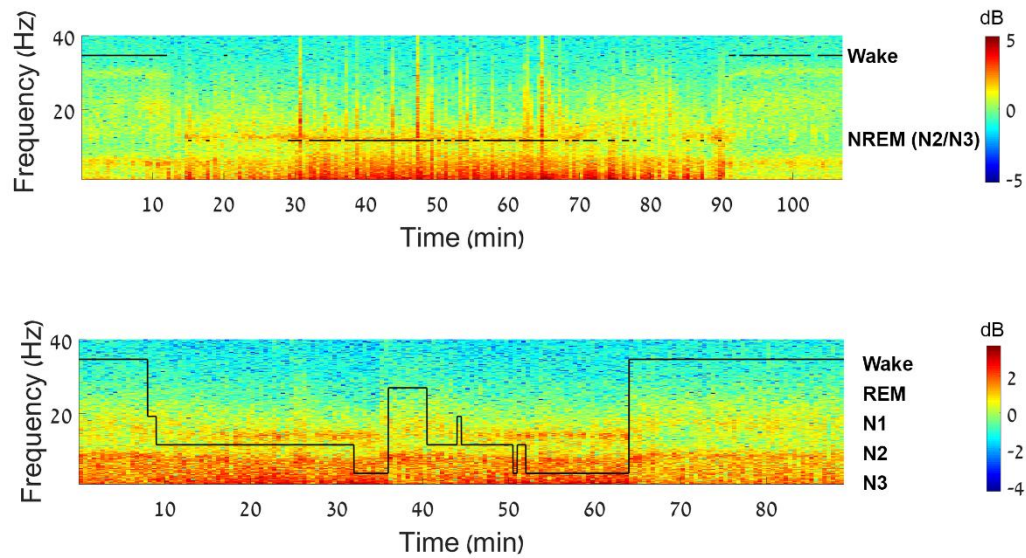

762

763 **Extended Data Fig. 1. Sleep scoring.** Representative time–frequency representation  
764 (spectrogram) of iEEG recorded during a nap session. Warm colors (e.g. red) indicate  
765 increased power in specific time–frequency windows (frequency shown on left side of  
766 y-axis). Superimposed hypnograms (in black) present the time-course of sleep/wake  
767 states (shown on right side of y-axis); top, one nap session with automatic sleep scoring;  
768 and bottom, one nap session with full PSG.

769

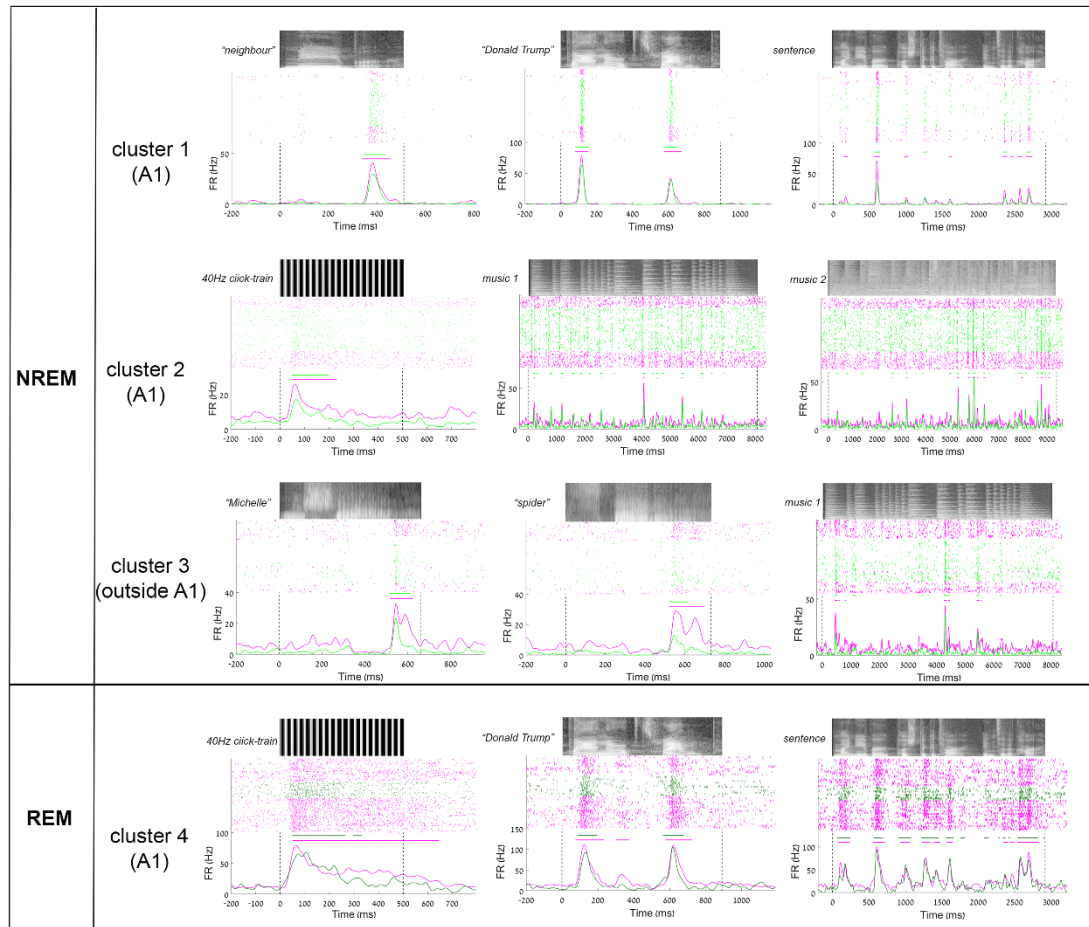

770

771 **Extended Data Fig. 2. Additional examples of neuronal auditory responses during**  
772 **wakefulness and NREM sleep.** Representative raster plots and PSTHs of unit spiking  
773 activities in auditory cortex in response to auditory stimuli during wakefulness (pink)  
774 and NREM sleep (light green) or REM sleep (dark green). Grayscale soundwave  
775 spectrograms are shown above each raster (lighter shades denote stronger power).  
776 Vertical dotted black lines mark stimulus onset and offset. Horizontal bars above PSTH  
777 time-courses indicate automatically-detected response intervals (Methods) for which  
778 the response magnitudes were compared quantitatively.

779

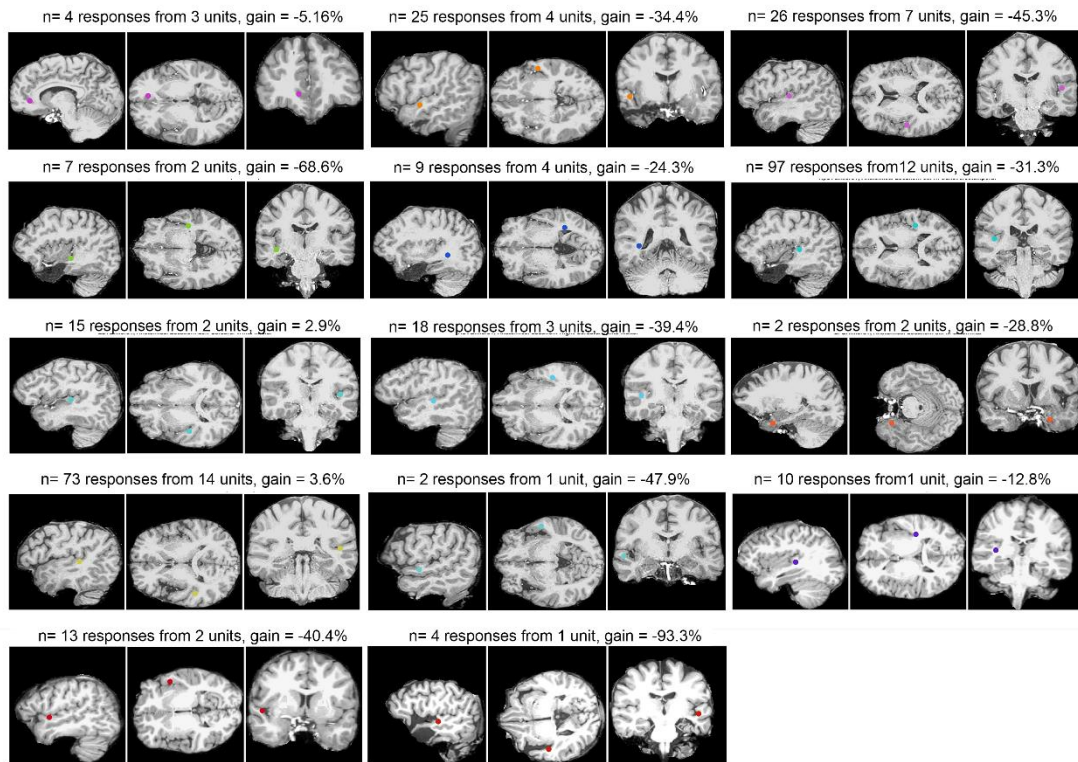

780

781 **Extended Data Fig. 3. Anatomical location of auditory-responsive units.** Each  
782 triplet of brain images shows sagittal (left), axial (middle), and coronal (right) MR  
783 sections. Colored dots denote the location of the microwire bundle as identified by co-  
784 registration of post-implant CT with pre-implant MRI (Methods), using native  
785 (individual) patient coordinates



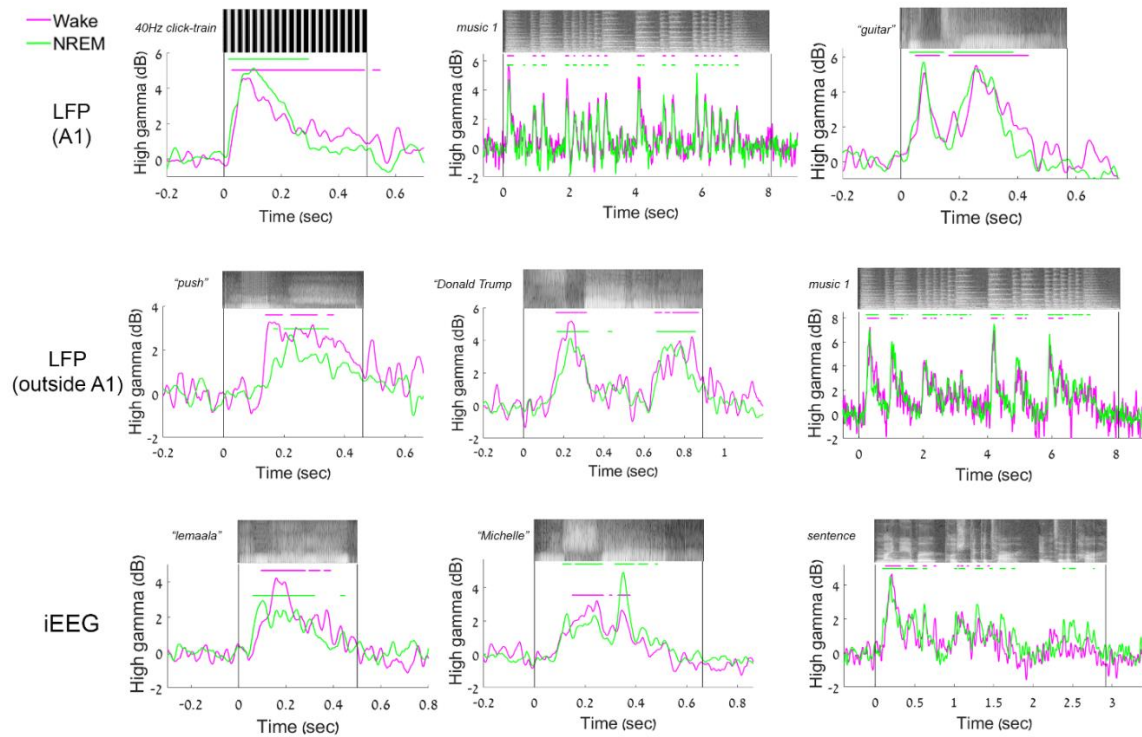

786

787

788 **Extended Data Fig. 4. Additional examples of LFP induced high-gamma auditory**  
789 **responses during wakefulness and NREM sleep. LFP induced high-gamma (80-**  
790 **200 Hz) power time-courses during wakefulness (pink) and NREM sleep (green) reveal**  
791 **similar profiles.**

792

793

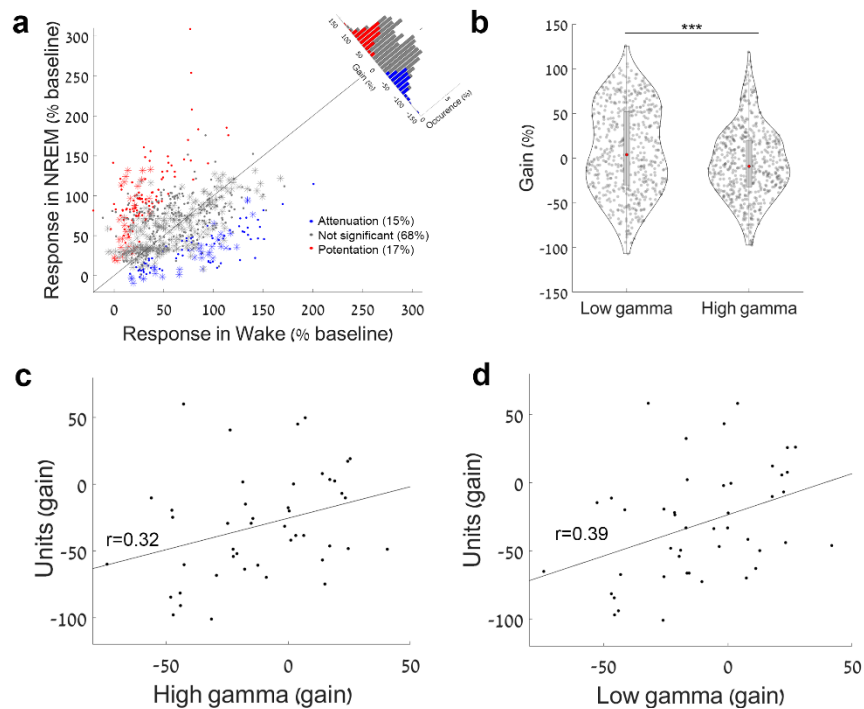

794

795 **Extended Data Fig. 5. Comparing how NREM sleep affects responses in spiking**  
796 **activity, LFP low-gamma power, and LFP high-gamma power.** (a) Scatter plot of  
797 all low-gamma (40-80 Hz) responses (power increase) to auditory stimuli ( $n = 418$   
798 responses from 61 LFP microwires and 292 responses from 42 iEEG electrodes) in  
799 NREM sleep (y-axis) vs. wakefulness (x-axis), together with a histogram of gain values  
800 comparing response magnitude (upper-right corner along the unity diagonal). Sleep was  
801 not associated with a trend for attenuation in response magnitude; instead, most  
802 (68.03%) low-gamma responses did not show significant differences across states,  
803 with 14.51% significantly attenuated in NREM sleep, and 17.46% significantly  
804 potentiated in sleep (mean gain: +7.87%). (b) Scatter plot of NREM sleep attenuation  
805 in LFP high-gamma responses (y-axis) vs. NREM sleep attenuation in LFP low-gamma  
806 responses (x-axis) reveals stronger sleep attenuation in high-gamma responses for the  
807 same microwires and stimuli (556 responses from 87 channels, mean gain: +8.7% and  
808 -5.6% for low gamma and high gamma, respectively,  $p < 0.001$  by Wilcoxon signed-  
809 rank test). (c) Scatter plot of the degree of NREM sleep attenuation in spiking responses  
810 (y-axis) vs. the degree of NREM sleep attenuation in LFP high-gamma responses (x-  
811 axis) reveals significant correlation ( $n = 45$  channels/units respectively, Pearson  
812 correlation coefficient  $r = 0.32$ ,  $p = 0.016$ , by random permutations tests, (Methods).  
813 (d) Same as (c) for LFP low-gamma power (Pearson correlation coefficient  $r = 0.39$ ,  
814  $p = 0.005$ ,  $n = 40$  channels/units).

815

816

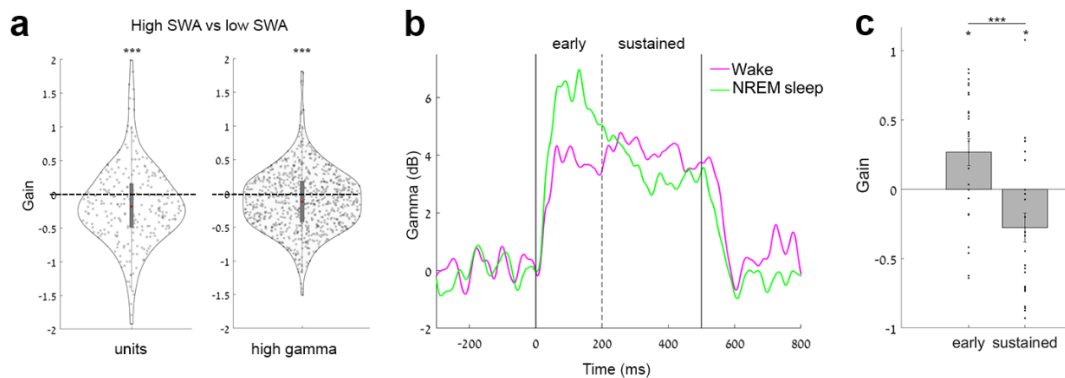

817

818

819 **Extended Data Fig. 6. Factors associated with the degree of auditory response**  
820 **attenuation in NREM sleep.** (a) (left) Auditory spike responses during NREM sleep  
821 with high (top 20%) SWA show stronger attenuation (negative gain on y-axis)  
822 compared to periods of low (bottom 20%) SWA ( $n = 263$  spike responses from 55  
823 clusters; attenuation of  $-16.10\%$ ,  $p = 5.9 \times 10^{-8}$  by signed-rank test). (right) same  
824 association between high SWA and greater sleep attenuation for auditory high-gamma  
825 LFP responses ( $n = 527$  high-gamma LFP responses from 74 microwires; attenuation  
826 of  $-10.73\%$ ,  $p = 6.8 \times 10^{-5}$  by signed-rank test). A similar effect was found for periods  
827 of high sigma (10-16 Hz) power representing spindle activities (gain =  $-7.04\%$ ,  
828  $p = 3.9 \times 10^{-6}$  for high gamma; gain =  $-8.31\%$ ,  $p = 5.3 \times 10^{-6}$  for spiking, signed-rank  
829 test). (b) Representative low-gamma response to a 40 Hz click-train in wakefulness  
830 (pink) and NREM sleep (green) shows differences between early vs. sustained response  
831 components. (c) Quantitative analysis across all low-gamma responses to 40 Hz click-  
832 trains ( $n = 25$  microwires) reveals that sustained responses show a stronger attenuation  
833 than early response during NREM sleep ( $p = 5.1 \times 10^{-5}$  by signed-rank test). Early  
834 responses were actually slightly potentiated during NREM sleep (positive gain of  
835  $26.65\%$ ,  $p = 0.016$  via signed-rank test).

836

837

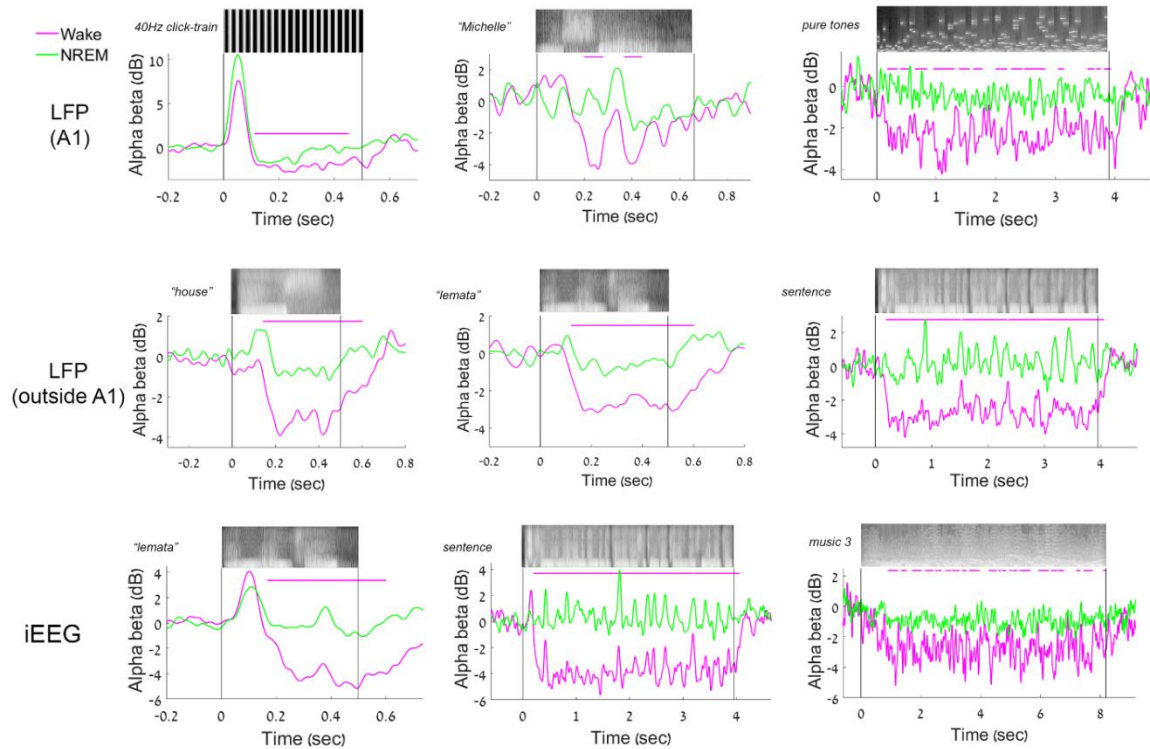



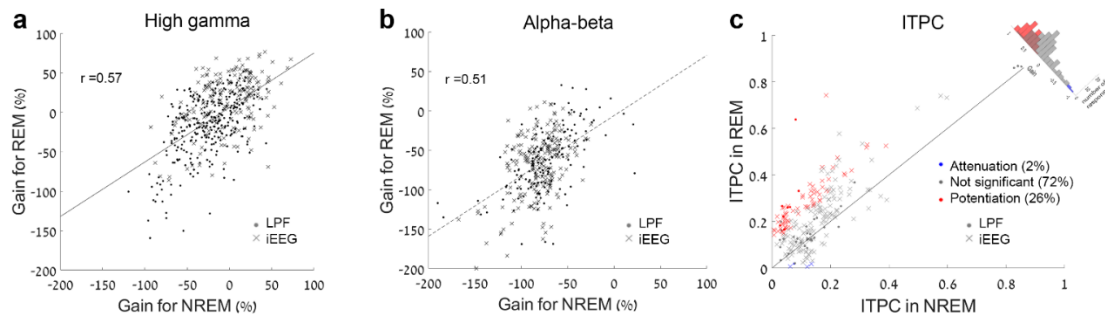

844

845 **Extended Data Fig. 8. Comparing responses in NREM and REM sleep.** (a) Scatter  
846 plot comparing the degree of sleep attenuation for high gamma power auditory  
847 responses ( $n = 89$  responses from LFP microwires and 86 responses from 15 iEEG  
848 electrodes) in REM sleep (y-axis) vs. NREM sleep (x-axis) shows significant  
849 correlation ( $r = 0.72$ ,  $p < 0.001$ ). (b) Same as (a) for ABD ( $n = 111$  responses from 16  
850 LFP microwires and 92 responses from 11 iEEG electrodes,  $r = 0.72$ ,  $p < 0.001$ ). (c)  
851 Scatter plot of inter-trial phase coherence (ITPC) of 40 Hz iEEG and LFP responses  
852 ( $n = 43$  and 202 respectively) in REM sleep (y-axis) vs. NREM sleep (x-axis), together  
853 with a histogram of gain values comparing response magnitudes (along the diagonal).  
854 The results reveal partial potentiation of the responses during REM sleep compared to  
855 NREM sleep (26% stronger entrainment, mean gain: +17.20%).

856

857

858

859

860
